# Supplementary material
Source: publisher figshare collection journal article supplement (https://frontiersin.figshare.com/ndownloader/files/15250541)
Supplement: Supplementary file 1 [file 15250541]

## Sheet: Plan1
Table 2 - List of water sampling stations and biogeochemical experiments carried in each station.
					PP = Primary Production experiment
					Number of samples
Ship Station	Latitude (°)	Longitude (°)	Bottom depth (m)	Depth of water sample (m)	Nutrients	Amonium	HPLC	Chlorophyll	cDOM	fDOM	Flow citometry	DNA	RNA	Water filtered for DNA (L)
S0449	-31.1563	-34.8298	859	5	3	1	1	1	1	1	3	1	-	10
S0449	-31.1563	-34.8298	859	51	3	1	1	1	1	1	3	1	-	10
S0449	-31.1563	-34.8298	859	120	3	1	1	1	1	1	3	1	-	10
S0449	-31.1563	-34.8298	859	400	3	1	1	1	1	1	3	1	-	10
S0449	-31.1563	-34.8298	859	630	3	1	1	1	1	1	3	1	-	10
S0449	-31.1563	-34.8298	859	800	3	1	1	1	1	1	3	1	-	10
S0450	-31.368	-34.844	963	0	3	1	1	1	PP	PP	3	PP	-	PP
S0450	-31.368	-34.844	963	10.8	3	1	1	1	1	1	3	1	-	10
S0450	-31.368	-34.844	963	32.5	3	1	1	1	PP	PP	3	PP	-	PP
S0450	-31.368	-34.844	963	43.5	3	1	1	1	PP	PP	3	PP	-	PP
S0450	-31.368	-34.844	963	53.1	3	1	1	1	PP	PP	3	PP	-	PP
S0450	-31.368	-34.844	963	62.2	3	1	1	1	PP	PP	3	PP	-	PP
S0450	-31.368	-34.844	963	76	3	1	1	1	PP	PP	3	PP	-	PP
S0450	-31.368	-34.844	963	94	3	1	1	1	PP	PP	3	PP	-	PP
S0450	-31.368	-34.844	963	105	3	1	1	1	1	1	3	1	-	10
S0450	-31.368	-34.844	963	140	3	1	1	1	1	1	3	1	-	10
S0450	-31.368	-34.844	963	450	3	1	1	-	1	1	3	1	-	10
S0450	-31.368	-34.844	963	900	3	1	1	-	1	1	3	1	-	10
S0452	-31.204	-34.7613	701	7	3	1	1	1	1	1	3	1	-	10
S0452	-31.204	-34.7613	701	125	3	1	1	1	1	1	3	1	-	10
S0452	-31.204	-34.7613	701	400	3	1	1	-	1	1	3	1	-	10
S0452	-31.204	-34.7613	701	610	3	1	1	-	1	1	3	1	-	10
S0454	-31.1343	-34.7267	2041	5	3	1	1	1	1	1	3	1	-	10
S0454	-31.1343	-34.7267	2041	110	3	1	1	1	1	1	3	1	-	10
S0454	-31.1343	-34.7267	2041	450	3	1	1	-	1	1	3	1	-	10
S0454	-31.1343	-34.7267	2041	820	3	1	1	-	1	1	3	1	-	10
S0454	-31.1343	-34.7267	2041	1600	3	1	1	-	1	1	3	1	-	10
S0454	-31.1343	-34.7267	2041	1900	3	1	1	-	1	1	3	1	-	10
S0457	-30.9055	-34.619	815	5	3	1	1	1	1	1	3	1	-	10
S0457	-30.9055	-34.619	815	100	3	1	1	1	1	1	3	1	-	10
S0457	-30.9055	-34.619	815	400	3	1	1	-	1	1	3	1	-	10
S0457	-30.9055	-34.619	815	700	3	1	1	-	1	1	3	1	-	10
S0468	-30.8912	-35.7168	1565	10.8	3	1	1	1	1	1	3	1	1	9
S0468	-30.8912	-35.7168	1565	100	3	1	1	1	1	1	3	1	1	9
S0468	-30.8912	-35.7168	1565	450	3	1	1	-	1	1	3	1	1	9
S0468	-30.8912	-35.7168	1565	850	3	1	1	-	1	1	3	1	1	9
S0468	-30.8912	-35.7168	1565	1400	3	1	1	-	1	1	3	1	1	9
S0470	-30.6697	-35.7747	819	5	3	1	1	1	1	1	3	1	1	9
S0470	-30.6697	-35.7747	819	120	3	1	1	1	1	1	3	1	1	9
S0470	-30.6697	-35.7747	819	450	3	1	1	-	1	1	3	1	1	9
S0470	-30.6697	-35.7747	819	680	3	1	1	-	1	1	3	1	1	9
S0472	-30.7815	-35.9637	1010	5	3	1	1	1	1	1	3	1	1	9
S0472	-30.7815	-35.9637	1010	90	3	1	1	1	1	1	3	1	1	9
S0472	-30.7815	-35.9637	1010	450	3	1	1	-	1	1	3	1	1	9
S0472	-30.7815	-35.9637	1010	950	3	1	1	-	1	1	3	1	1	9
S0474	-30.8698	-35.956	1203	5	3	1	1	1	1	1	3	1	1	9
S0474	-30.8698	-35.956	1203	90	3	1	1	1	1	1	3	1	1	9
S0474	-30.8698	-35.956	1203	450	3	1	1	-	1	1	3	1	1	9
S0474	-30.8698	-35.956	1203	1100	3	1	1	-	1	1	3	1	1	9
S0475	-30.8997	-35.9497	1246	0	3	1	1	1	PP	PP	3	PP	PP	PP
S0475	-30.8997	-35.9497	1246	11	3	1	1	1	PP	PP	3	PP	PP	PP
S0475	-30.8997	-35.9497	1246	33	3	1	1	1	PP	PP	3	PP	PP	PP
S0475	-30.8997	-35.9497	1246	44	3	1	1	1	PP	PP	3	PP	PP	PP
S0475	-30.8997	-35.9497	1246	54	3	1	1	1	PP	PP	3	PP	PP	PP
S0475	-30.8997	-35.9497	1246	63	3	1		1	PP	PP	3	PP	PP	PP
S0475	-30.8997	-35.9497	1246	77	3	1	1	1	PP	PP	3	PP	PP	PP
S0475	-30.8997	-35.9497	1246	89	3	1		1	PP	PP	3	PP	PP	PP
S0475	-30.8997	-35.9497	1246	107	3	1		1	PP	PP	3	PP	PP	PP
S0475	-30.8997	-35.9497	1246	142	3	1	1	1	PP	PP	3	PP	PP	PP
S0480	-30.8637	-35.9993	704	3	3	1	1	1	1	1	3	1	1	9
S0480	-30.8637	-35.9993	704	115	3	1	1	1	1	1	3	1	1	9
S0480	-30.8637	-35.9993	704	450	3	1	1	-	1	1	3	1	1	9
S0480	-30.8637	-35.9993	704	650	3	1	1	-	1	1	3	1	1	9
S0481	-31.0833	-36.0837	1807	8	3	1	1	1	1	1	3	1	1	9
S0481	-31.0833	-36.0837	1807	9.7	3	1	1	1	PP	PP	3	PP	PP	PP
S0481	-31.0833	-36.0837	1807	29.3	3	1	1	1	PP	PP	3	PP	PP	PP
S0481	-31.0833	-36.0837	1807	39.2	3	1	1	1	PP	PP	3	PP	PP	PP
S0481	-31.0833	-36.0837	1807	47.9	3	1	1	1	PP	PP	3	PP	PP	PP
S0481	-31.0833	-36.0837	1807	56.1	3	1	1	1	PP	PP	3	PP	PP	PP
S0481	-31.0833	-36.0837	1807	68.6	3	1	1	1	PP	PP	3	PP	PP	PP
S0481	-31.0833	-36.0837	1807	78.5	3	1	1	1	PP	PP	3	PP	PP	PP
S0481	-31.0833	-36.0837	1807	95.4	3	1	1	1	PP	PP	3	PP	PP	PP
S0481	-31.0833	-36.0837	1807	126.4	3	1	1	1	1	1	3	1	1	9
S0481	-31.0833	-36.0837	1807	450	3	1	1	-	1	1	3	1	1	9
S0481	-31.0833	-36.0837	1807	1100	3	1	1	-	1	1	3	1	1	9
S0481	-31.0833	-36.0837	1807	1400	3	1	-	-	1	1	3	1	1	9
S0481	-31.0833	-36.0837	1807	1610	3	1	-	-	-	-	3	-	-	-
S0485	-31.0465	-36.1993	748	5	3	1	1	1	1	1	3	1	1	9
S0485	-31.0465	-36.1993	748	85	3	1	1	1	1	1	3	1	1	9
S0485	-31.0465	-36.1993	748	450	3	1	1	-	1	1	3	1	1	9
S0485	-31.0465	-36.1993	748	680	3	1	1	-	1	1	3	1	1	9
S0500	-30.9368	-36.262	826	10	3	1	1	1	1	1	3	1	1	9
S0500	-30.9368	-36.262	826	95	3	1	1	1	1	1	3	1	1	9
S0500	-30.9368	-36.262	826	450	3	1	1	-	1	1	3	1	1	9
S0500	-30.9368	-36.262	826	740	3	1	1	-	1	1	3	1	1	9
S0507	-30.7427	-35.8998	1449	5	3	1	1	1	1	1	3	1	1	9
S0507	-30.7427	-35.8998	1449	120	3	1	1	1	1	1	3	1	1	9
S0507	-30.7427	-35.8998	1449	450	3	1	1	-	1	1	3	1	1	9
S0507	-30.7427	-35.8998	1449	800	3	1	1	-	1	1	3	1	1	9
S0507	-30.7427	-35.8998	1449	1388	3	1	1	-	1	1	3	1	1	9
